# Supplementary figures and images for: The Species-Specific Responses of Freshwater Diatoms to Elevated Temperatures Are Affected by Interspecific Interactions
Source: MDPI journal article supplement (doi:10.3390/microorganisms6030082), 2018-08-07

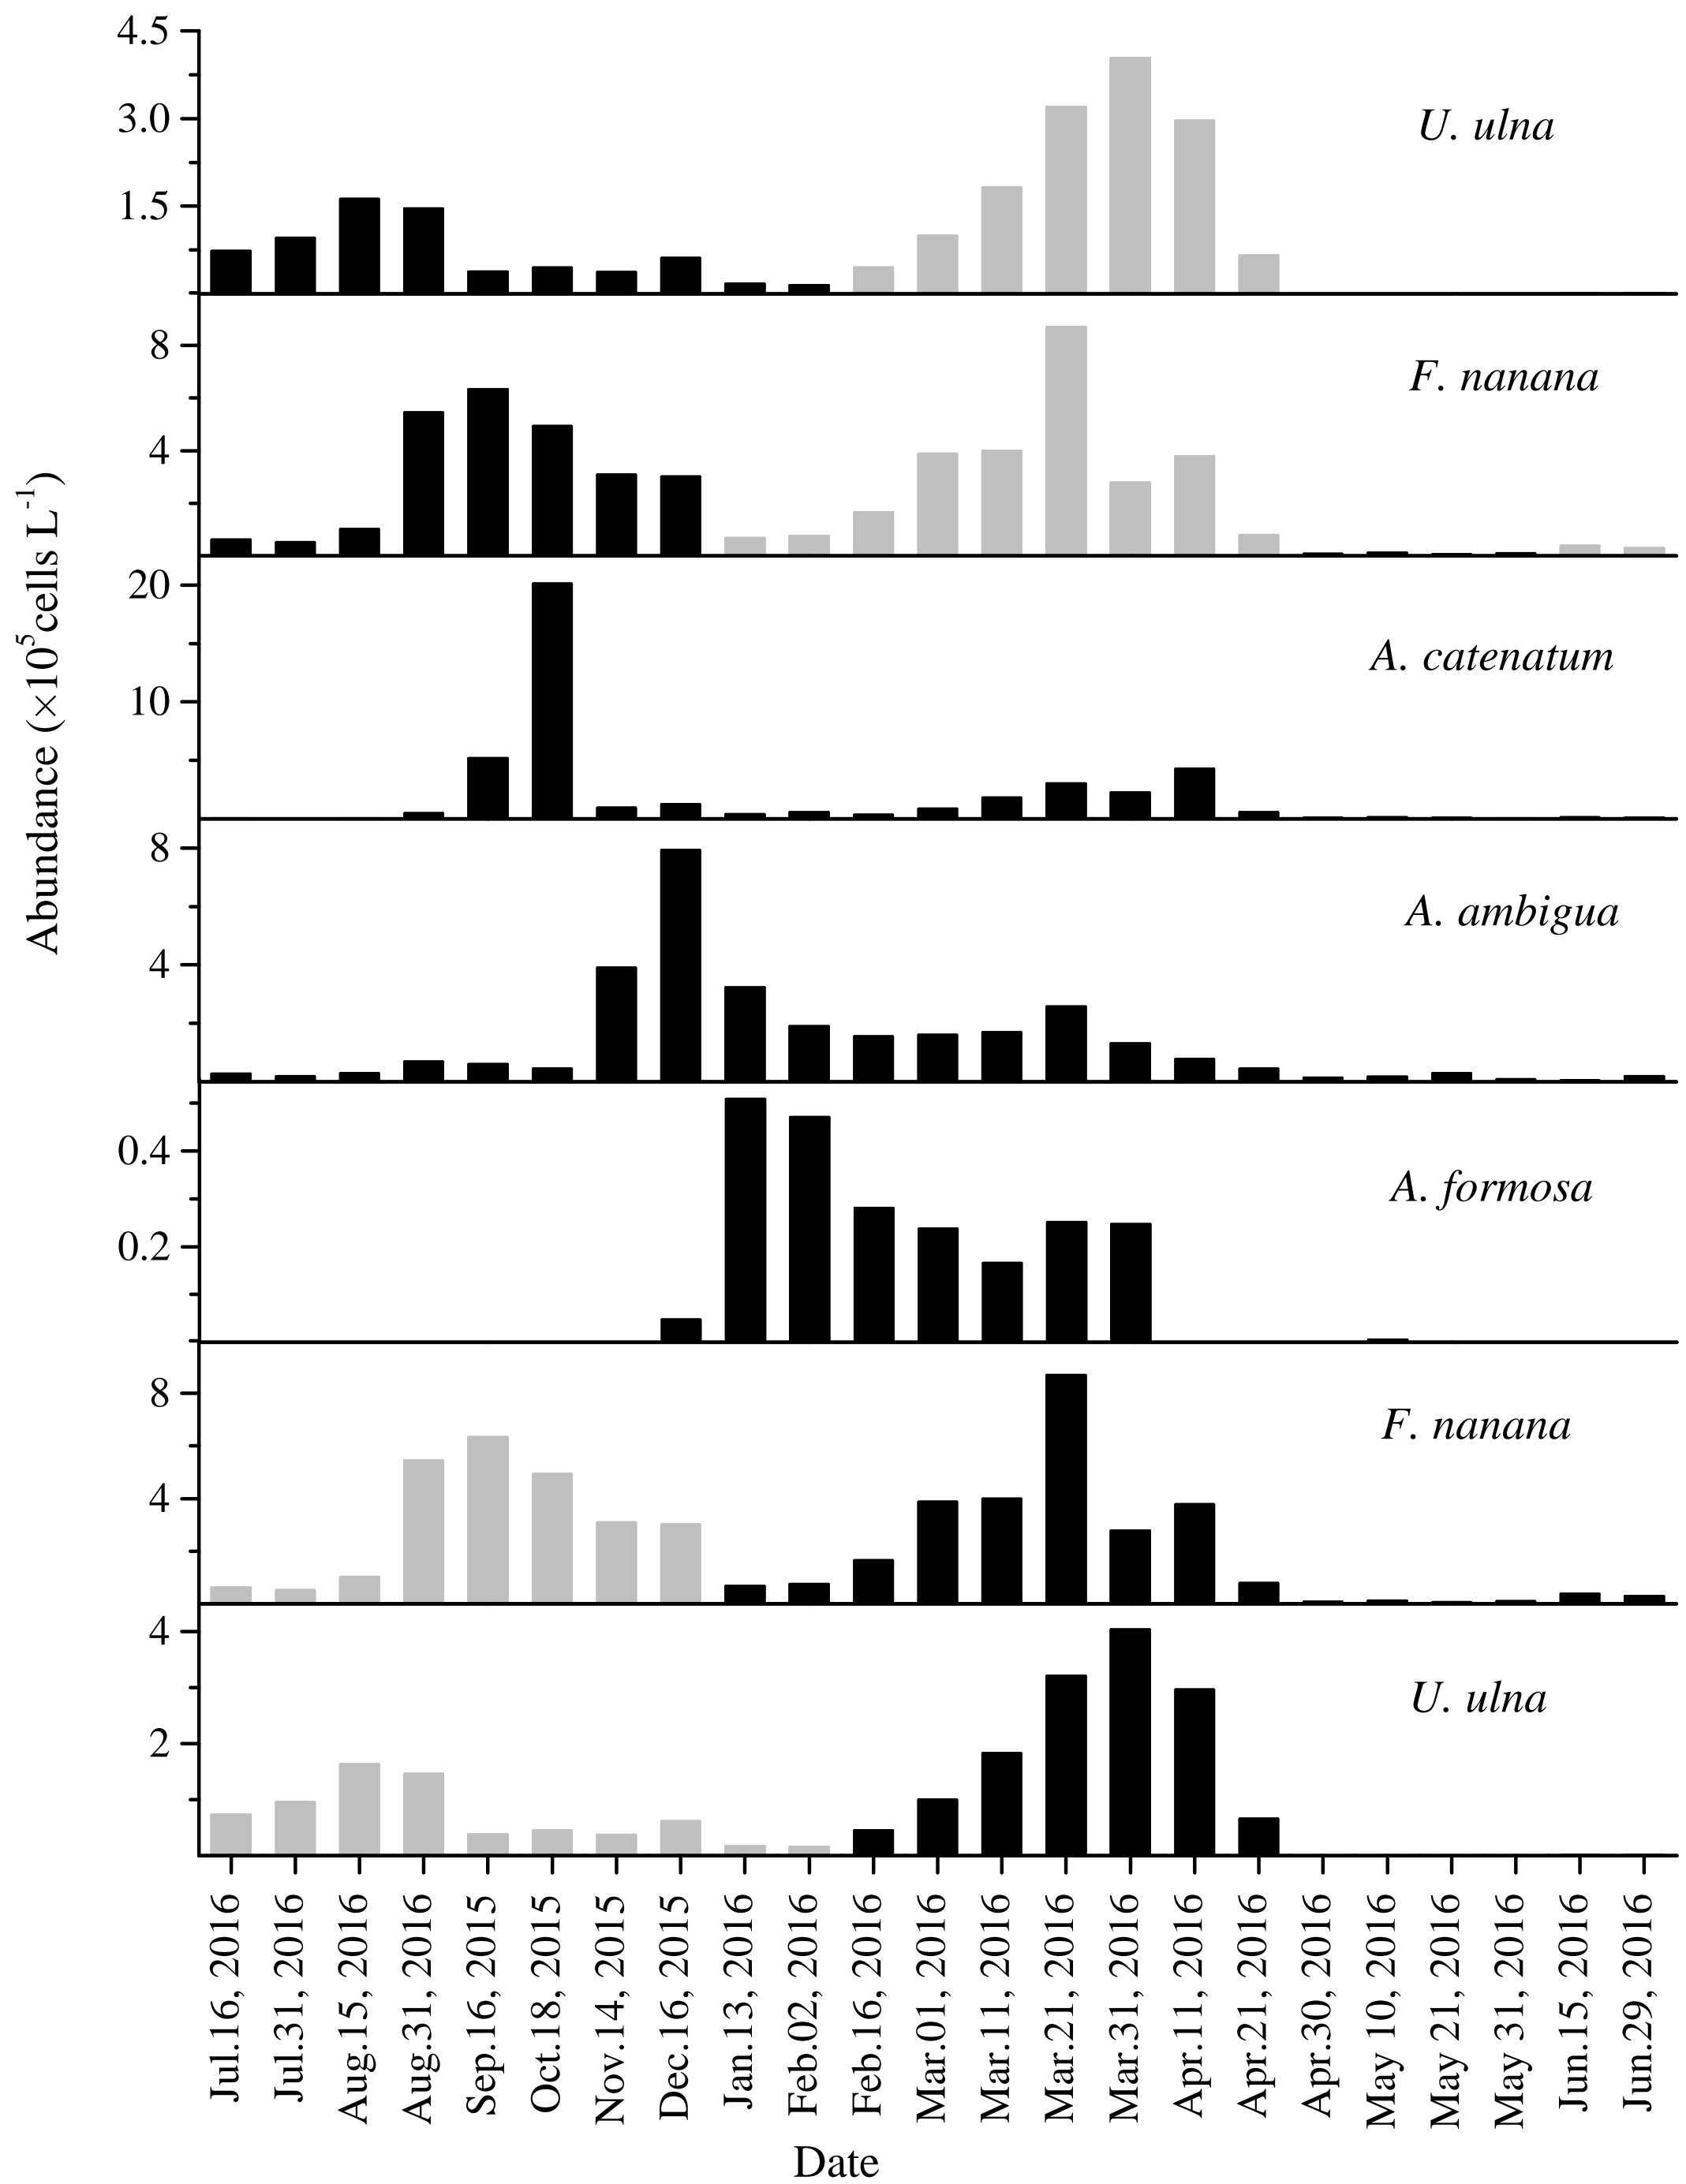

Supplement: s1 [file s1]

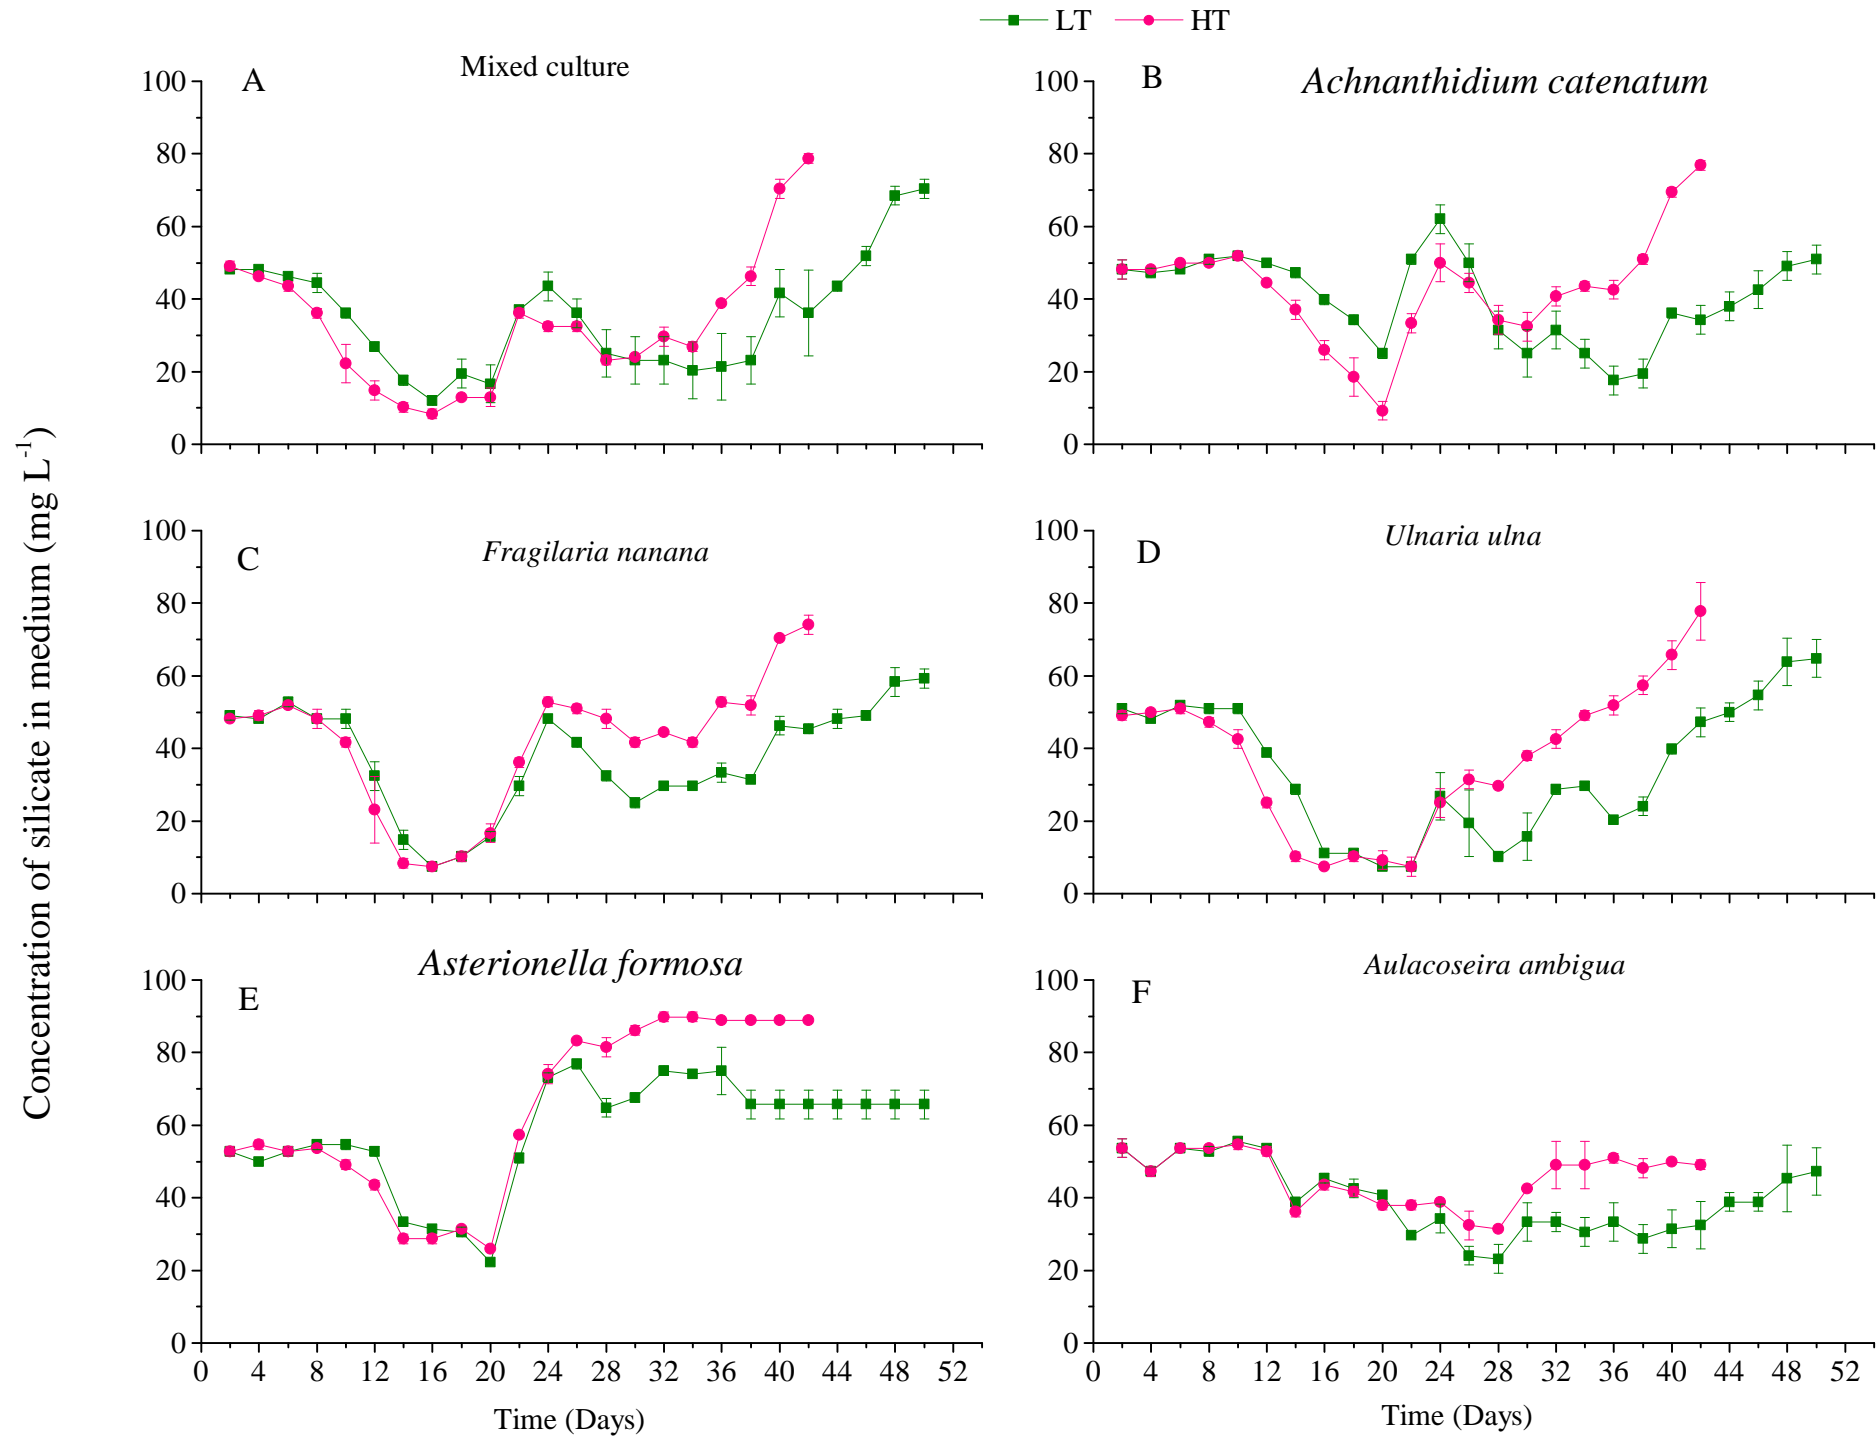

Supplement: s1 [file s1]
